# Supplementary material for: Antigenicity, stability, and reproducibility of Zika reporter virus particles for long-term applications
Source: PLoS Negl Trop Dis. 2020 Nov 18;14(11):e0008730. doi: 10.1371/journal.pntd.0008730 (PMC7673510; doi:10.1371/journal.pntd.0008730)
Supplement: S2 Table — a TYMC: total yeast and mold count (limit of detection: 1 cfu/mL). b TAMC: total aerobic microbial count (limit of detection: 2 cfu/mL). c GenScript ToxinSensor Gel Clot Endotoxin Assay System (limit of detection: 1 EU/mL). d Sigma LookOut PCR kit, result indicated by absence/presence of specific PCR product. e Lonza MycoAlert kit, result interpreted according to manufacturer’s protocol. (DOCX) [file pntd.0008730.s002.docx]

**Table S2. Quality control tests and results for luciferase ZIKV RVPs**

| **Test** | **Result** |
| --- | --- |
| Bioburden (USP61) | < 1 cfu/mL TYMC*a* |
| Bioburden (USP61) | < 2 cfu/mL TAMC*b* |
| Endotoxin | < 1 EU/mL*c* |
| *Mycoplasma* (PCR) | Negative*d* |
| *Mycoplasma* (ELISA) | Negative*e* |

*a* TYMC: total yeast and mold count (limit of detection : 1 cfu/mL)

*b* TAMC: total aerobic microbial count (limit of detection: 2 cfu/mL)

*c* GenScript ToxinSensor Gel Clot Endotoxin Assay System (limit of detection: 1 EU/mL)

*d* Sigma LookOut PCR kit, result indicated by absence/presence of specific PCR product

*e* Lonza MycoAlert kit, result interpreted according to manufacturer’s protocol
